# Supplementary material for: Cost-effectiveness of female human papillomavirus vaccination in 179 countries: a PRIME modelling study
Source: Elsevier journal article supplement (doi:10.1016/s2214-109x(14)70237-2), 2014-06-09
Supplement: mmc1 [file mmc1.pdf]

# THE LANCET Global Health

## Supplementary appendix

This appendix formed part of the original submission and has been peer reviewed. We post it as supplied by the authors.

Supplement to: Jit M, Brisson M, Portnoy A, Hutubessy R. Cost-effectiveness of female human papillomavirus vaccination in 179 countries: a PRIME modelling study. *Lancet Glob Health* 2014; published online June 10. [http://dx.doi.org/10.1016/S2214-109X\(14\)70237-2](http://dx.doi.org/10.1016/S2214-109X(14)70237-2).

## Appendix 1. Full list of calculations used in the model.

### *Life expectancy*

Life expectancy at each year of life was calculated from mortality risks using the following life tables formulae:

Probability of dying between age  $i$  and  $(i + 1)$  (mortality risk) is given by  $qx(i)$

Probability of surviving from age  $i$  to  $(i + 1)$ ,  $px(i) = 1 - qx(i)$

Proportion of cohort surviving to age  $i$ ,  $Lx(i)$  is given by  $Lx(1) = 1$ ;  $Lx(i + 1) = Lx(i) \times px(i)$  for  $i > 1$

Person-years alive between age  $i$  and  $(i + 1)$ ,  $Lx(i)$  is given by  $Lx(i + 1) = (Lx(i + 1) + Lx(i + 2))/2$  for  $i < 101$ ,  $Lx(101) = Lx(101)/2$

Person-years alive after age  $i$ ,  $Tx(i)$  is given by  $Tx(1) = Lx(1) + Lx(2) + \dots + Lx(101)$ ;  $Tx(i + 1) = Tx(i) - Lx(i)$

Life expectancy at age  $i$ ,  $Ex(i) = Tx(i)/Lx(i)$

### *Vaccine impact*

For each year of age  $i$  ( $0 \leq i \leq 101$ ),

$p(i)$  = proportion of cervical cancers acquired at age  $i$  due to HPV 16/18

$x(i)$  = overall cervical cancer incidence at age  $i$  prior to vaccination

$v_1$  = vaccine efficacy against HPV 16/18

$v_2$  = vaccine efficacy against HPV types other than 16/18

$c$  = 3-dose HPV vaccine coverage prior to sexual debut

$m(i)$  = 5-year mortality rate for cervical cancer acquired at age  $i$

Number of cancers prevented at age  $i$ ,  $C(i) = x(i) \times [v_1 p(i) + v_2 (1 - p(i))] \times c$

Number of deaths prevented at age  $i$ ,  $M(i) = x(i) \times [v_1 p(i) + v_2 (1 - p(i))] \times c \times m(i)$

### *Economic outcomes*

$a$  = number of DALYs due to a non-fatal cervical cancer episode

$b$  = cost of treating one case of cervical cancer

$i_0$  = age of routine vaccination

$d$  = discount rate

Number of life years saved by vaccination =  $M(i) \times Ex(i)$

Number of DALYs prevented by vaccination =  $M(i) \times Ex(i) + C(i) \times d$

Cost saved by vaccination =  $C(i) \times b$

Discounted life expectancy at age  $i$ ,  $dEx(i) = \sum_{j=i_0}^i (1+d)^{-(j-i_0)} + (Ex(i) - j)^{-(j-i_0)}$

Discounted life years saved by vaccination =  $M(i) \times dEx(i) \times (1+d)^{-(i-i_0)}$

Discounted DALYs prevented by vaccination =  $(M(i) \times dEx(i) + C(i) \times d) \times (1+d)^{-(i-i_0)}$

**Appendix 2. Parameters used in the validation exercise and the full analysis, with justification and assessment of quality.**

*Validation data set.* All cost-effectiveness analyses of vaccinating girls in early adolescence reported in a 2013 review by Fesenfeld and co-workers <sup>1</sup> were initially considered for the validation exercise. Analyses of other vaccination options (including catch-up programmes, vaccination of older women and male vaccination) were not considered. One study <sup>2</sup> which considered 72 GAVI-eligible countries in a single analysis was treated separately because the number of comparison data points in that study exceeded the other studies combined. Three other studies (one covering 22 countries in Asia <sup>3</sup>, one covering 28 countries in Latin America <sup>4</sup> and one comparing rotavirus and HPV vaccination in 72 GAVI-eligible countries <sup>5</sup>) used essentially the same model as the original GAVI-72 study <sup>2</sup>, with many overlapping countries, so these were not considered as they would be expected to perform similarly against PRIME. An analysis covering most WHO member-states <sup>6</sup> did not report country-level results and so was not considered. All 17 remaining studies (covering 26 countries) were included in the validation exercise.

If a paper contained several scenarios with different assumptions, then the scenario regarded as base case was chosen. If no scenario was regarded as the base case then the scenario with the following attributes was chosen: health care provider or purchaser perspective, lifelong vaccine duration, no screening, lowest vaccine cost reported (or vaccine cost of I\$25 per fully vaccinated girl for Goldie et al. <sup>2</sup>), bivalent vaccine, 100% efficacy against vaccine-type disease, no cross-protection.

In general, PRIME was parameterised using the parameters in the individual study it as being compared against. A few parameters were not taken from individual studies because they were poorly reported in many studies, and because the diversity in the way this was calculated limited comparability between studies (eg. cancer stages). These were: % of cancer due to HPV 16/18, birth cohort size, all-cause mortality and DALYs incurred per cancer episode.

Costs were converted into 2011 USD using the methodology described in Fesenfeld et al. (2013)<sup>1</sup>.

The table below shows the source of parameters used in the validation exercise and global projection:

| Parameter                    | Validation                                                                                                                                                                                                                                                                                                                                                                                                                                                                                                                                                           | Global projection                                           |
|------------------------------|----------------------------------------------------------------------------------------------------------------------------------------------------------------------------------------------------------------------------------------------------------------------------------------------------------------------------------------------------------------------------------------------------------------------------------------------------------------------------------------------------------------------------------------------------------------------|-------------------------------------------------------------|
| DALYs due to cervical cancer | A disability weight of 0.08 for cervical cancer diagnosis, therapy and control over one year was assumed, based on the 2001 Global Burden of Disease study <sup>7</sup> . For non-fatal cases, an additional weight of 0.04 – 0.17 (depending on the WHO mortality stratum of the country) for four years was assumed to account for long-term sequelae (infertility and incontinence). For fatal cases, an additional weight of 0.78 for one year was assumed to account for 6 months of preterminal metastasis stage cancer and 6 months of terminal stage cancer. |                                                             |
| Vaccination coverage         | Coverage by dose reported in the original study.<br>Exceptions:                                                                                                                                                                                                                                                                                                                                                                                                                                                                                                      | 100% for all three doses for illustrative purposes. This is |

|                                               |                                                                                                                                                                                                                                                                                                                                                                                                                                                                                                                                                                                                                                                                                                                                                                                                                                                                |                                                                                                                                                                                                                                                                           |
|-----------------------------------------------|----------------------------------------------------------------------------------------------------------------------------------------------------------------------------------------------------------------------------------------------------------------------------------------------------------------------------------------------------------------------------------------------------------------------------------------------------------------------------------------------------------------------------------------------------------------------------------------------------------------------------------------------------------------------------------------------------------------------------------------------------------------------------------------------------------------------------------------------------------------|---------------------------------------------------------------------------------------------------------------------------------------------------------------------------------------------------------------------------------------------------------------------------|
|                                               | <ul style="list-style-type: none"> <li>• One study <sup>8</sup> assumed that coverage of dose one, two and three was 70%, 55% and 40% respectively, with corresponding efficacy of 30%, 90% and 100%. We converted this into an equivalent three dose coverage of <math>(40\% + 55\% + 70\%)/3 = 55\%</math> and equivalent efficacy of <math>((70\% - 55\%) \times 30\% + (55\% - 40\%) \times 90\% + 40\% \times 100\%)/70\% = 82.7\%</math>.</li> <li>• One paper <sup>9</sup> assumed that vaccination coverage would increase from 0% to 70% over the first 5 years and remain at 70% thereafter; we assumed coverage of 70%.</li> </ul>                                                                                                                                                                                                                  | higher than reported in many settings where HPV vaccination has been introduced, but has no effect on cost-effectiveness or impact per 100,000 vaccinated in a static model.                                                                                              |
| Vaccine efficacy                              | <p>Vaccine efficacy against HPV 16/18 reported in the original study. Vaccine efficacy against any other type assumed to be 0%.</p> <p>Exceptions:</p> <ul style="list-style-type: none"> <li>• Two studies <sup>10,11</sup> used vaccine efficacy figures against cancer due to any HPV type, rather than against disease due to HPV 16 and 18 only. However, since the reported efficacy against cancer regardless of HPV type was close to <sup>11</sup> or greater than <sup>10,11</sup> the % of cancers due to HPV 16/18 (based on IARC data), we assumed that vaccine efficacy against HPV 16/18 was 100%.</li> <li>• Two studies <sup>12,13</sup> assumed vaccine efficacy of 95%; we assumed that this applied to vaccine-type disease only.</li> <li>• One study <sup>14</sup> did not report vaccine efficacy so we assumed it was 100%.</li> </ul> | 100% against cervical cancer caused by HPV types 16 and 18; 0% against any other type.                                                                                                                                                                                    |
| Current and future size of vaccination cohort | As used in the original study (although this does not affect the cost-effectiveness ratio).                                                                                                                                                                                                                                                                                                                                                                                                                                                                                                                                                                                                                                                                                                                                                                    | Data from the United Nations Population Division <sup>15</sup> . The size of the 10-14 year old age group for females (medium fertility variant) was divided by five to obtain an estimate for the number of 12 year old girls. Data from 2012 was used as the base case. |
| Age at vaccination                            | Vaccination was assumed to occur before sexual debut in all countries. The age of routine                                                                                                                                                                                                                                                                                                                                                                                                                                                                                                                                                                                                                                                                                                                                                                      | Assumed to be at age 12 and before sexual debut.                                                                                                                                                                                                                          |

|                        |                                                                                                                                                                                                                                                                                                                                  |                                                                                                                                                                                                                                                                                                                                                                                                                                                                                                                                                                                                                                                                                                                                                                                                                                                                                                                                                                      |
|------------------------|----------------------------------------------------------------------------------------------------------------------------------------------------------------------------------------------------------------------------------------------------------------------------------------------------------------------------------|----------------------------------------------------------------------------------------------------------------------------------------------------------------------------------------------------------------------------------------------------------------------------------------------------------------------------------------------------------------------------------------------------------------------------------------------------------------------------------------------------------------------------------------------------------------------------------------------------------------------------------------------------------------------------------------------------------------------------------------------------------------------------------------------------------------------------------------------------------------------------------------------------------------------------------------------------------------------|
|                        | vaccination reported in the original study was used. For studies <sup>8,16-19</sup> that reported assuming that vaccination occurred “before the age of 12”, we assumed that vaccination took place at 11 years of age.                                                                                                          |                                                                                                                                                                                                                                                                                                                                                                                                                                                                                                                                                                                                                                                                                                                                                                                                                                                                                                                                                                      |
| Vaccination cost       | Cost per fully immunised girl used in the original study if given, otherwise three times vaccine dose cost plus any administration costs (if stated). For the comparison with the GAVI-72 study <sup>2</sup> , the scenario with cost of I\$25 per vaccinated girl was used. Costs of boosters were not incorporated.            | Total of vaccine procurement costs and delivery costs.<br><br>(i) Vaccine procurement costs: For GAVI eligible countries set to an indicative price of \$4.50/dose offered to GAVI <sup>20</sup> ; for PAHO and middle income countries set to 2013 bivalent vaccine price from PAHO Revolving Fund Vaccine Prices <sup>21</sup> ; and high income countries set to US retail vaccine price <sup>22</sup> .<br><br>(ii) Vaccine delivery costs: Costing studies in Tanzania, Bhutan and Uganda suggest that the cost of scaling up HPV vaccine delivery to a nationwide programme may range from \$4.56 to \$5.27 per fully immunised girl <sup>23</sup> . In high income countries, costs may be substantially higher; for example \$9 per dose in a US study <sup>24</sup> and £4.37 per dose in a UK study <sup>25</sup> . Hence we assumed delivery costs per fully immunised girl of \$5, \$15 and \$25 for low, middle and high income countries respectively. |
| Cancer treatment costs | Cost per episode, over lifetime, as recorded in the paper.<br><br>If a range of costs (eg. by stage at detection or by time of treatment) was presented, the average of the highest and lowest cost was taken.<br>In one case <sup>26</sup> , lifetime cancer costs were not presented, so costs as for the global analysis used | The stage distribution of cancer was estimated from the distribution of 15,081 patients by stage in FIGO’s 26th Annual Report on the Results of Treatment in Gynecological Cancer <sup>27</sup> . Reporting centres were                                                                                                                                                                                                                                                                                                                                                                                                                                                                                                                                                                                                                                                                                                                                             |

|                           |                                                                                                                                                                                                                                                                                                                                                                                                                                                                                                                                                                                                                                                                                                                                                                                                                                                                                                                                                                                                                 |                                                                                                                                                                                                                                                                                                                                                                                                                                                                                                                                       |
|---------------------------|-----------------------------------------------------------------------------------------------------------------------------------------------------------------------------------------------------------------------------------------------------------------------------------------------------------------------------------------------------------------------------------------------------------------------------------------------------------------------------------------------------------------------------------------------------------------------------------------------------------------------------------------------------------------------------------------------------------------------------------------------------------------------------------------------------------------------------------------------------------------------------------------------------------------------------------------------------------------------------------------------------------------|---------------------------------------------------------------------------------------------------------------------------------------------------------------------------------------------------------------------------------------------------------------------------------------------------------------------------------------------------------------------------------------------------------------------------------------------------------------------------------------------------------------------------------------|
|                           | <p>instead.</p> <p>For the GAVI-72 study <sup>2</sup>, treatment costs for Guinea appear to be misprinted; reported costs are I\$5682-I\$7047, which are higher than any other country examined and more than twice the next highest country (Zimbabwe; I\$2717-I\$3370). Hence costs for Guinea-Bissau (I\$570-I\$897) were used instead.</p>                                                                                                                                                                                                                                                                                                                                                                                                                                                                                                                                                                                                                                                                  | <p>aggregated by WHO-CHOICE region to get separate figures for each region.</p> <p>Cost of cancer treatment for cancers detected at each stage in each of 14 WHO-CHOICE regions was obtained from a WHO-CHOICE study <sup>6</sup> and personal communication from Gary Ginsberg. These included facility, staff, medical device and pharmaceutical costs. In a sensitivity analysis, regional costs were further adjusted for country-level GDP per capita (see below).</p> <p>Societal (productivity) costs were not considered.</p> |
| GDP per capita            | GDP per capita in 2011 US\$ from the World Bank <sup>28</sup> .                                                                                                                                                                                                                                                                                                                                                                                                                                                                                                                                                                                                                                                                                                                                                                                                                                                                                                                                                 |                                                                                                                                                                                                                                                                                                                                                                                                                                                                                                                                       |
| Cervical cancer incidence | <ul style="list-style-type: none"> <li>• If age-dependent cervical cancer incidence (either as a direct model input, model calibration target or failing that, as model output) was not presented in numerical form, GLOBOCAN 2008 data<sup>29</sup> was used.</li> <li>• If bounds were used for calibration targets <sup>16,19</sup>, then the midpoint was taken.</li> <li>• If lifetime or overall cancer incidence was available <sup>9,11,30,31</sup>, then GLOBOCAN 2008 data was summed over all age groups multiplied up or down to match.</li> <li>• If no figures were given but a graph was shown <sup>10,26,32,33</sup>, this was digitised using Engauge Digitizer version 4.1[<a href="http://digitizer.sourceforge.net/">http://digitizer.sourceforge.net/</a>].</li> <li>• One paper <sup>14</sup> had cervical cancer incidence at about 10 times the average of the other groups. It was assumed this was a misprint, and hence cancer incidence in that paper was divided by 10.</li> </ul> | Incidence by age interpolated from cervical cancer incidence by age group from GLOBOCAN 2012 <sup>34</sup> .                                                                                                                                                                                                                                                                                                                                                                                                                          |
| Cervical                  | Because cervical cancer mortality is often not                                                                                                                                                                                                                                                                                                                                                                                                                                                                                                                                                                                                                                                                                                                                                                                                                                                                                                                                                                  | Cervical cancer mortality by                                                                                                                                                                                                                                                                                                                                                                                                                                                                                                          |

|                                       |                                                                                                                                                                                                                                          |                                           |
|---------------------------------------|------------------------------------------------------------------------------------------------------------------------------------------------------------------------------------------------------------------------------------------|-------------------------------------------|
| cancer mortality                      | well reported in papers in the literature, we instead use GLOBOCAN 2008 cervical cancer mortality figures <sup>29</sup> multiplied by the ratio of cervical cancer incidence in the paper to cervical cancer incidence in GLOBOCAN 2008. | age from GLOBOCAN 2012 <sup>34</sup> .    |
| All cause mortality                   | All cause mortality in 2009 from the World Health Organization <sup>35</sup> .                                                                                                                                                           |                                           |
| % of cervical cancer due to HPV 16/18 | Data by geographical region in a meta-analysis <sup>36</sup> .                                                                                                                                                                           |                                           |
| Discount rate                         | As used in the original study. In one paper <sup>8</sup> the discount rate was not stated; we assumed that it was 3% based on the rate used in other papers by the same group.                                                           | 3% for costs and benefits <sup>37</sup> . |

### Adjustment of regional cancer treatment costs for country-level GDP per capita

In a sensitivity analysis, cancer treatment costs were adjusted for within-region income differences. To do this, we stratified countries within each region by quintile according to GDP per capita (in 2011 USD). Treatment costs were then multiplied by an adjustment factor corresponding to the quintile of the country:

| Quintile | Percentage range | Cost multiplier      |
|----------|------------------|----------------------|
| 1        | [0, 20%)         | 60%                  |
| 2        | [20, 40%)        | 80%                  |
| 3        | [40, 60%)        | 100% (no adjustment) |
| 4        | [60, 80%)        | 120%                 |
| 5        | [80, 100%]       | 140%                 |

### Assessment of the quality of data informing model predictions.

*HPV type distribution in cervical cancer.* HPV type distribution was obtained in a meta-analysis stratified by geographical region<sup>36</sup>. Where the meta-analysis included data from the country being analysed we judged data quality as “satisfactory”, otherwise it was judged as “unsatisfactory”.

*Cervical cancer stage at diagnosis.* The proportion of cancers detected at the local, regional and distant stage were obtained from a FIGO report<sup>27</sup> and aggregated by WHO-CHOICE region. Where the analysis included data from the country being analysed we judged data quality as “satisfactory”, otherwise it was judged as “unsatisfactory”.

*Cervical cancer incidence.* Incidence by age was interpolated from cervical cancer incidence by age group from GLOBOCAN 2012<sup>34</sup>. GLOBOCAN 2012 estimates are rated according to two criteria: availability of data and quality of methods (see [http://globocan.iarc.fr/Pages/DataSource\\_and\\_methods.aspx](http://globocan.iarc.fr/Pages/DataSource_and_methods.aspx) for further details). When data availability was given a rating of A-D (on a scale of A-G; A-D represents high quality and/or

national data) it was deemed “satisfactory”. When methods quality was given a rating of 1-2 (on a scale of 1-9; 1-2 represents rates projected to or applied to 2012 populations) it was deemed “satisfactory”. For the overall data to be “satisfactory”, it needed to be deemed “satisfactory” for both these categories; otherwise it was deemed “unsatisfactory”.

*Cervical cancer mortality.* Cancer mortality by age was interpolated from cervical cancer mortality by age group from GLOBOCAN 2012<sup>34</sup>. GLOBOCAN 2012 estimates are rated according to two criteria: availability of data and quality of methods (see [http://globocan.iarc.fr/Pages/DataSource\\_and\\_methods.aspx](http://globocan.iarc.fr/Pages/DataSource_and_methods.aspx) for further details). When data availability was given a rating of 1-2 (on a scale of 1-6; 1-2 represent high/medium quality vital registration data) it was deemed “satisfactory”. When methods quality was given a rating of 1-2 (on a scale of 1-6; 1-2 represents rates projected to or applied to 2012 populations) it was deemed satisfactory. For the overall data to be satisfactory, it needed to be deemed satisfactory for both these categories.

#### Reference List

1. Fesenfeld M, Hutubessy R, Jit M. Cost-effectiveness of human papillomavirus vaccination in low and middle income countries: a systematic review. *Vaccine* 2013; **31**: 3786-804.
2. Goldie SJ, O'Shea M, Campos NG, Diaz M, Sweet S, Kim SY. Health and economic outcomes of HPV 16,18 vaccination in 72 GAVI-eligible countries. *Vaccine* 2008; **26**: 4080-93.
3. Goldie SJ, Diaz M, Kim SY, Levin CE, Van Minh H, Kim JJ. Mathematical models of cervical cancer prevention in the Asia Pacific region. *Vaccine* 2008; **26 Suppl 12**: M17-M29.
4. Goldie SJ, Diaz M, Constenla D, Alvis N, Andrus JK, Kim SY. Mathematical models of cervical cancer prevention in Latin America and the Caribbean. *Vaccine* 2008; **26 Suppl 11**: L59-L72.
5. Kim SY, Sweet S, Chang J, Goldie SJ. Comparative evaluation of the potential impact of rotavirus versus HPV vaccination in GAVI-eligible countries: a preliminary analysis focused on the relative disease burden. *BMC Infect Dis* 2011; **11**: 174.
6. Ginsberg GM, Edejer TT, Lauer JA, Sepulveda C. Screening, prevention and treatment of cervical cancer -- a global and regional generalized cost-effectiveness analysis. *Vaccine* 2009; **27**: 6060-79.
7. Mathers, C. D., Lopez, A. D., and Murray, C. J. L. The Burden of Disease and Mortality by Condition: Data, Methods and Results for 2001. In: Lopez AD, Mathers CD, Ezzati M, et al., editors. *Global Burden of Disease and Risk Factors*. Washington (DC): World Bank; 2006. 2006.



8. Campos NG, Kim JJ, Castle PE, Ortendahl JD, O'Shea M, Diaz M et al. Health and economic impact of HPV 16/18 vaccination and cervical cancer screening in Eastern Africa. *Int J Cancer* 2012; **130**: 2672-84.
9. Insinga RP, Dasbach EJ, Elbasha EH, Puig A, Reynales-Shigematsu LM. Cost-effectiveness of quadrivalent human papillomavirus (HPV) vaccination in Mexico: a transmission dynamic model-based evaluation. *Vaccine* 2007; **26**: 128-39.
10. Praditsitthikorn N, Teerawattananon Y, Tantivess S, Limwattananon S, Riewpaiboon A', Chichareon S et al. Economic evaluation of policy options for prevention and control of cervical cancer in Thailand. *Pharmacoeconomics* 2011; **29**: 781-806.
11. Suarez E, Smith JS, Bosch FX, Nieminen P, Chen CJ, Torvinen S et al. Cost-effectiveness of vaccination against cervical cancer: a multi-regional analysis assessing the impact of vaccine characteristics and alternative vaccination scenarios. *Vaccine* 2008; **26 Suppl 5**: F29-F45.
12. Ezat SW, Aljunid S. Comparative cost-effectiveness of HPV vaccines in the prevention of cervical cancer in Malaysia. *Asian Pac J Cancer Prev* 2010; **11**: 943-51.
13. Ezat WP, Aljunid S. Cost-effectiveness of HPV vaccination in the prevention of cervical cancer in Malaysia. *Asian Pac J Cancer Prev* 2010; **11**: 79-90.
14. Gutierrez-Delgado C, Baez-Mendoza C, Gonzalez-Pier E, de la Rosa AP, Witlen R. [Generalized cost-effectiveness of preventive interventions against cervical cancer in Mexican women: results of a Markov model from the public sector perspective]. *Salud Publica Mex* 2008; **50**: 107-18.
15. United Nations, Department of Economic and Social Affairs, Population Division. World Population Prospects: The 2010 Revision, CD-ROM Edition.
16. Diaz M, Kim JJ, Albero G, de Sanjose S, Clifford G, Bosch FX et al. Health and economic impact of HPV 16 and 18 vaccination and cervical cancer screening in India. *Br J Cancer* 2008; **99**: 230-8.
17. Goldie SJ, Kim JJ, Kobus K, Goldhaber-Fiebert JD, Salomon J, O'shea MK et al. Cost-effectiveness of HPV 16, 18 vaccination in Brazil. *Vaccine* 2007; **25**: 6257-70.
18. Kim JJ, Kobus KE, Diaz M, O'Shea M, Van Minh H, Goldie SJ. Exploring the cost-effectiveness of HPV vaccination in Vietnam: insights for evidence-based cervical cancer prevention policy. *Vaccine* 2008; **26**: 4015-24.
19. Sharma M, Ortendahl J, van der HE, Sy S, Kim JJ. Cost-effectiveness of human papillomavirus vaccination and cervical cancer screening in Thailand. *BJOG* 2012; **119**: 166-76.

20. GAVI Alliance. GAVI funds vaccines to protect girls against cervical cancer. <http://www.gavialliance.org/library/news/press-releases/2013/gavi-funds-vaccines-to-protect-girls-against-cervical-cancer/>. Accessed on 10 February 2013. 2013.
21. Pan American Health Organization. PAHO Revolving Fund Vaccine Prices for the Year 2013 - Amendment III. [http://www.paho.org/hq/index.php?option=com\\_docman&task=doc\\_download&gid=19889&Itemid=&lang=en](http://www.paho.org/hq/index.php?option=com_docman&task=doc_download&gid=19889&Itemid=&lang=en). Accessed on 1 Dec 2013. 2013.
22. Centers for Disease Control and Prevention. HPV Vaccine Information For Young Women - Fact Sheet. <http://www.cdc.gov/std/hpv/stdfact-hpv-vaccine-young-women.htm>. Accessed on 1 Dec 2013. 2013.
23. Levin, A., Wang, S., Levin, C., Tsu, V., and Hutubessy, R. Costs of introducing and delivering HPV vaccines in low and lower middle income countries: inputs for GAVI policy on introduction grant support to countries. *PLoS ONE*; forthcoming.
24. Kim JJ, Goldie SJ. Health and economic implications of HPV vaccination in the United States. *N Engl J Med* 2008; **359**: 821-32.
25. Jit M, Choi YH, Edmunds WJ. Economic evaluation of human papillomavirus vaccination in the United Kingdom. *BMJ* 2008; **337**: a769.
26. Termrungruanglert W, Havanond P, Khemapech N, Lertmaharit S, Pongpanich S, Khorprasert C et al. Cost and effectiveness evaluation of prophylactic HPV vaccine in developing countries. *Value Health* 2012; **15**: S29-S34.
27. Quinn MA, Benedet JL, Odicino F, Maisonneuve P, Beller U, Creasman WT et al. Carcinoma of the cervix uteri. FIGO 26th Annual Report on the Results of Treatment in Gynecological Cancer. *Int J Gynaecol Obstet* 2006; **95 Suppl 1**: S43-103.
28. The World Bank. GDP per capita (current US\$). <http://data.worldbank.org/indicator/NY.GDP.PCAP.CD>. Accessed on 15 Jan 2013.
29. International Agency for Research on Cancer. GLOBOCAN 2008. Cancer fact sheet. Cervical Cancer Incidence and Mortality Worldwide in 2008.
30. Colantonio L, Gomez JA, Demarteau N, Standaert B, Pichon-Riviere A, Augustovski F. Cost-effectiveness analysis of a cervical cancer vaccine in five Latin American countries. *Vaccine* 2009; **27**: 5519-29.
31. Gutierrez-Aguado A. [Cost-utility of the vaccine against the Human Papiloma Virus in Peruvian women]. *Rev Peru Med Exp Salud Publica* 2011; **28**: 416-25.
32. Canfell K, Shi JF, Lew JB, Walker R, Zhao FH, Simonella L et al. Prevention of cervical cancer in rural China: evaluation of HPV vaccination and primary HPV screening strategies. *Vaccine* 2011; **29**: 2487-94.

33. Reynales-Shigematsu LM, Rodrigues ER, Lazcano-Ponce E. Cost-effectiveness analysis of a quadrivalent human papilloma virus vaccine in Mexico. *Arch Med Res* 2009; **40**: 503-13.
34. International Agency for Research on Cancer. GLOBOCAN 2012: Estimated Cancer Incidence, Mortality and Prevalence Worldwide in 2012. Fact Sheets by Cancer: cervix uteri.
35. World Health Organization. Global Health Observatory Database (2008 data).
36. Li N, Franceschi S, Howell-Jones R, Snijders PJ, Clifford GM. Human papillomavirus type distribution in 30,848 invasive cervical cancers worldwide: Variation by geographical region, histological type and year of publication. *Int J Cancer* 2011; **128**: 927-35.
37. Tan-Torres Edejer, T., Baltussen, R., Adam, T., Hutubessy, R., Acharya, A., Evans, D. B., and Murray, C. J. L. eds. Making choices in health: WHO guide to cost-effectiveness analysis. Geneva: World Health Organisation; 2003. 2003. Geneva, World Health Organisation.

**Appendix 3. Validation of PRIME results against other cost-effectiveness analyses of HPV vaccination in LMICs (Figure 1 of main manuscript)**

*Validation against analyses in 26 LMICs examined in 17 studies reviewed by Fesenfeld et al. (2013)*

|   | Country     | Code | First author | Year | Paper                                                                                                 | ICER (vs no prevention) | ICER (vs screening) | Denominator | GDP per capita | PRIME Cost per life year saved | PRIME Cost per DALY prevented | Very cost-effective in which model? |
|---|-------------|------|--------------|------|-------------------------------------------------------------------------------------------------------|-------------------------|---------------------|-------------|----------------|--------------------------------|-------------------------------|-------------------------------------|
| 1 | Kenya       | KE   | Campos       | 2012 | Health and economic impact of HPV 16/18 vaccination and cervical cancer screening in Eastern Africa   | 184                     | Not applicable      | Life years  | 808            | 62.9                           | 59.3                          | Both                                |
| 2 | Mozambique  | MZ   | Campos       | 2012 | Health and economic impact of HPV 16/18 vaccination and cervical cancer screening in Eastern Africa   | 92                      | Not applicable      | Life years  | 535            | 69.8                           | 65.3                          | Both                                |
| 3 | Tanzania    | TZ   | Campos       | 2012 | Health and economic impact of HPV 16/18 vaccination and cervical cancer screening in Eastern Africa   | Cost saving             | Not applicable      | Life years  | 532            | 28.1                           | 26.4                          | Both                                |
| 4 | Uganda      | UG   | Campos       | 2012 | Health and economic impact of HPV 16/18 vaccination and cervical cancer screening in Eastern Africa   | 23                      | Not applicable      | Life years  | 487            | 6.77                           | 6.39                          | Both                                |
| 5 | Rural China | CN   | Canfell      | 2011 | Prevention of cervical cancer in rural China: Evaluation of HPV vaccination and primary HPV screening | 2926                    | Not applicable      | Life years  | 5445           | 948                            | 891                           | Both                                |

|    |           |    |            |      |                                                                                                |                |                |                |       |             |             |             |         |
|----|-----------|----|------------|------|------------------------------------------------------------------------------------------------|----------------|----------------|----------------|-------|-------------|-------------|-------------|---------|
|    |           |    |            |      | strategies                                                                                     |                |                |                |       |             |             |             |         |
| 6  | Argentina | AR | Colantonio | 2009 | Cost-effectiveness analysis of a cervical cancer vaccine in five Latin American countries      | Not applicable | 19321          | QALYs          | 10942 | 23800       | 22400       | Neither     |         |
| 7  | Brazil    | BR | Colantonio | 2009 | Cost-effectiveness analysis of a cervical cancer vaccine in five Latin American countries      | Not applicable | 18175          | QALYs          | 12594 | 25300       | 23800       | Neither     |         |
| 8  | Chile     | CL | Colantonio | 2009 | Cost-effectiveness analysis of a cervical cancer vaccine in five Latin American countries      | Not applicable | 28187          | QALYs          | 14394 | 36900       | 34700       | Neither     |         |
| 9  | Mexico    | MX | Colantonio | 2009 | Cost-effectiveness analysis of a cervical cancer vaccine in five Latin American countries      | Not applicable | 16169          | QALYs          | 10047 | 20900       | 19700       | Neither     |         |
| 10 | Peru      | PE | Colantonio | 2009 | Cost-effectiveness analysis of a cervical cancer vaccine in five Latin American countries      | Not applicable | 10263          | QALYs          | 6018  | 18000       | 16800       | Neither     |         |
| 11 | India     | IN | Diaz       | 2008 | Health and economic impact of HPV 16 and 18 vaccination and cervical cancer screening in India | Cost saving    | Not applicable | Life years     | 1489  | Cost saving | Cost saving | Both        |         |
| 12 | Malaysia  | MY | Ezat       | 2010 | Cost-effectiveness of HPV Vaccination in the Prevention of Cervical Cancer in Malaysia         |                | 18603          | Not applicable | QALYs | 9977        | 13300       | 12100       | Neither |
| 13 | Malaysia  | MY | Ezat       | 2010 | Comparative Cost-Effectiveness of HPV Vaccines in the Prevention of Cervical                   |                | 4158           | Not applicable | QALYs | 9977        | Cost saving | Cost saving | Both    |

|    |          |    |                   |      |                                                                                                                                    |             |                |            |       |       |       |         |
|----|----------|----|-------------------|------|------------------------------------------------------------------------------------------------------------------------------------|-------------|----------------|------------|-------|-------|-------|---------|
|    |          |    |                   |      | Cancer in Malaysia                                                                                                                 |             |                |            |       |       |       |         |
| 14 | Brazil   | BR | Goldie            | 2007 | Cost-effectiveness of HPV 16, 18 vaccination in Brazil                                                                             | Cost saving | Not applicable | Life years | 12594 | -258  | -242  | Both    |
| 15 | Peru     | PE | Gutierrez-Aguado  | 2011 | Costo-utilidad de la vacuna contra el virus de papiloma humano en mujeres peruanas                                                 | 11717       | Not applicable | QALYs      | 6018  | 2590  | 2390  | PRIME   |
| 16 | Mexico   | MX | Gutierrez-Delgado | 2008 | Relación costo-efectividad de las intervenciones preventivas contra el cáncer cervical en mujeres mexicanas                        | 11927       | 11631          | DALYs      | 10047 | 13400 | 12600 | Neither |
| 17 | Mexico   | MX | Insinga           | 2007 | Cost-effectiveness of quadrivalent human papillomavirus (HPV) vaccination in Mexico: A transmission-dynamic model-based evaluation | na          | 4502           | QALYs      | 10047 | 8600  | 8110  | Both    |
| 18 | Vietnam  | VN | Kim               | 2008 | Exploring the cost-effectiveness of HPV prevention in Vietnam: Insights for evidence-based cervical cancer prevention policy       | 849         | Not applicable | Life years | 1407  | 757   | 710   | Both    |
| 19 | Vietnam  | VN | Kim               | 2008 | Exploring the cost-effectiveness of HPV prevention in Vietnam: Insights for evidence-based cervical cancer prevention policy       | 26          | Not applicable | Life years | 1407  | 48.9  | 46    | Both    |
| 20 | Thailand | TH | Praditsitt hikorn | 2011 | Economic Evaluation of Policy Options for Prevention and Control of Cervical Cancer in Thailand                                    | 12642       | 16000          | QALYs      | 4972  | 27400 | 25600 | Neither |
| 21 | Mexico   | MX | Reynales          | 2009 | Cost-effectiveness                                                                                                                 | 116         | Not            | Life       | 10047 | Cost  | Cost  | Both    |

|    |              |    |                   |      |                                                                                                                                      |                |                |            |       |             |             |         |
|----|--------------|----|-------------------|------|--------------------------------------------------------------------------------------------------------------------------------------|----------------|----------------|------------|-------|-------------|-------------|---------|
|    |              |    | - Shigematsu      |      | Analysis of a quadrivalent Human Papilloma Virus Vaccine in Mexico                                                                   |                | applicable     | years      |       | saving      | saving      |         |
| 22 | Thailand     | TH | Sharma            | 2011 | Cost-effectiveness of human papillomavirus vaccination and cervical cancer screening in Thailand                                     | Cost saving    | Not applicable | Life years | 4972  | Cost saving | Cost saving | Both    |
| 23 | South Africa | ZA | Sinanovic         | 2009 | The potential cost-effectiveness of adding a human papillomavirus vaccine to the cervical cancer screening programme in South Africa | Not applicable | 1521           | QALYs      | 8070  | 25200       | 23200       | Paper   |
| 24 | Chile        | CL | Suares            | 2008 | A multi-regional analysis assessing the impact of vaccine characteristics and alternative vaccination scenarios                      | Not applicable | 33309          | QALYs      | 14393 | 62300       | 58300       | Neither |
| 25 | Poland       | PL | Suares            | 2008 | A multi-regional analysis assessing the impact of vaccine characteristics and alternative vaccination scenarios                      | Not applicable | 35602          | QALYs      | 13463 | 37200       | 35100       | Neither |
| 26 | Thailand     | TH | Termrungruanglert | 2012 | Cost and Effectiveness Evaluation of Prophylactic HPV Vaccine in Developing Countries                                                | 8890           | Not applicable | QALYs      | 4972  | 8260        | 7700        | Neither |

*Validation against Goldie et al. (2008)*

|    | <b>Country</b>           | <b>Code</b> | <b>GNI per capita</b> | <b>Goldie cost per DALY prevented</b> | <b>PRIME cost per DALY prevented</b> |
|----|--------------------------|-------------|-----------------------|---------------------------------------|--------------------------------------|
| 1  | AFGHANISTAN              | AF          | 1,060                 | 1410                                  | 1626                                 |
| 2  | ANGOLA                   | AO          | 5,290                 | 450                                   | 212                                  |
| 3  | ARMENIA                  | AM          | 6,140                 | 310                                   | 365                                  |
| 4  | AZERBAIJAN               | AZ          | 9,020                 | 720                                   | 929                                  |
| 5  | BANGLADESH               | BD          | 1,940                 | 240                                   | 312                                  |
| 6  | BENIN                    | BJ          | 1,630                 | 270                                   | 305                                  |
| 7  | BHUTAN                   | BT          | 5,480                 | 250                                   | 354                                  |
| 8  | BOLIVIA                  | BO          | 4,920                 | 240                                   | 90                                   |
| 9  | BURKINA FASO             | BF          | 1,310                 | 460                                   | 298                                  |
| 10 | BURUNDI                  | BI          | 610                   | 220                                   | 224                                  |
| 11 | CAMBODIA                 | KH          | 2,260                 | 210                                   | 266                                  |
| 12 | CAMEROON                 | CM          | 2,360                 | 340                                   | 210                                  |
| 13 | CENTRAL AFRICAN REPUBLIC | CF          | 810                   | 800                                   | 502                                  |
| 14 | CHAD                     | TD          | 1,370                 | 660                                   | 499                                  |
| 15 | COMOROS                  | KM          | 1,120                 | 90                                    | 135                                  |
| 16 | CONGO                    | CG          | 3,280                 | 430                                   | 320                                  |
| 17 | DR CONGO                 | CD          | 350                   | 550                                   | 364                                  |
| 18 | CÔTE D'IVOIRE            | CI          | 1,730                 | 390                                   | 231                                  |
| 19 | CUBA                     | CU          | 11,823                | 390                                   | 390                                  |
| 20 | DJIBOUTI                 | DJ          | 2,450                 | 120                                   | 139                                  |
| 21 | ERITREA                  | ER          | 580                   | 120                                   | 118                                  |
| 22 | ETHIOPIA                 | ET          | 1,110                 | 190                                   | 271                                  |
| 23 | GEORGIA                  | GE          | 5,390                 | 310                                   | 390                                  |
| 24 | GHANA                    | GH          | 1,820                 | 310                                   | 151                                  |
| 25 | GUINEA                   | GN          | 1,050                 | 580                                   | 391                                  |
| 26 | GUINEA-BISSAU            | GW          | 1,250                 | 240                                   | 183                                  |
| 27 | GUYANA                   | GY          | 3,460                 | 170                                   | 41                                   |
| 28 | HAITI                    | HT          | 1,190                 | 110                                   | 108                                  |
| 29 | HONDURAS                 | HN          | 3,840                 | 340                                   | 257                                  |
| 30 | INDIA                    | IN          | 3,620                 | 250                                   | 308                                  |
| 31 | INDONESIA                | ID          | 4,530                 | 360                                   | 564                                  |
| 32 | KENYA                    | KE          | 1,720                 | 320                                   | 332                                  |
| 33 | KIRIBATI                 | KI          | 3,480                 | 780                                   | 1139                                 |
| 34 | DPR KOREA                | KP          | 7,312                 | 420                                   | 465                                  |
| 35 | KYRGYZSTAN               | KG          | 2,290                 | 280                                   | 338                                  |
| 36 | LAO PDR                  | LA          | 2,600                 | 520                                   | 638                                  |
| 37 | LESOTHO                  | LS          | 2,070                 | 270                                   | 64                                   |



|    |                       |    |        |      |      |
|----|-----------------------|----|--------|------|------|
| 38 | LIBERIA               | LR | 520    | 390  | 218  |
| 39 | MADAGASCAR            | MG | 950    | 140  | 135  |
| 40 | MALAWI                | MW | 870    | 260  | 243  |
| 41 | MALI                  | ML | 1,050  | 550  | 281  |
| 42 | MAURITANIA            | MR | 2,410  | 310  | 187  |
| 43 | MOLDOVA               | MD | 3,670  | 320  | 391  |
| 44 | MONGOLIA              | MN | 4,360  | 470  | 756  |
| 45 | MOZAMBIQUE            | MZ | 980    | 430  | 472  |
| 46 | MYANMAR               | MM | 7,312  | 260  | 394  |
| 47 | NEPAL                 | NP | 1,260  | 270  | 267  |
| 48 | NICARAGUA             | NI | 2,840  | 120  | 49   |
| 49 | NIGER                 | NE | 720    | 690  | 426  |
| 50 | NIGERIA               | NG | 2,300  | 1080 | 673  |
| 51 | PAKISTAN              | PK | 2,880  | 1430 | 1368 |
| 52 | PAPUA NEW GUINEA      | PG | 2,590  | 140  | 138  |
| 53 | RWANDA                | RW | 1,240  | 130  | 110  |
| 54 | SAO TOME AND PRINCIPE | ST | 2,080  | 380  | 112  |
| 55 | SENEGAL               | SN | 1,960  | 240  | 85   |
| 56 | SIERRA LEONE          | SL | 850    | 580  | 426  |
| 57 | SOLOMON ISLANDS       | SB | 2,360  | 130  | 148  |
| 58 | SOMALIA               | SO | 10,866 | 190  | 252  |
| 59 | SRI LANKA             | LK | 5,560  | 370  | 525  |
| 60 | SUDAN                 | SD | 2,020  | 660  | 728  |
| 61 | TAJIKISTAN            | TJ | 2,120  | 710  | 905  |
| 62 | TANZANIA              | TZ | 1,510  | 160  | 134  |
| 63 | GAMBIA                | GM | 2,060  | 290  | 171  |
| 64 | TIMOR-LESTE           | TL | 5,210  | 410  | 557  |
| 65 | TOGO                  | TG | 1,030  | 360  | 212  |
| 66 | UGANDA                | UG | 1,320  | 100  | 149  |
| 67 | UKRAINE               | UA | 7,080  | 390  | 566  |
| 68 | UZBEKISTAN            | UZ | 3,440  | 590  | 784  |
| 69 | VIET NAM              | VN | 3,260  | 1200 | 1473 |
| 70 | VIET NAM              | VN | 3,260  | 250  | 267  |
| 71 | YEMEN                 | YE | 2,180  | 1380 | 1313 |
| 72 | ZAMBIA                | ZM | 1,490  | 220  | 215  |
| 73 | ZIMBABWE              | ZW | 2,233  | 140  | 109  |

#### Appendix 4. PRIME projections for vaccinating 12-year old girls in 179 countries

|    | Country                | Code | Cohort size ('000s) | Vaccine cost (\$m) | Net cost (\$m) | Cancers prevented | Deaths prevented | GDP per capita (US\$2011) | Cost per life year saved | Cost per DALY prevented | Conclusion | Cancers prevented per 100,000 girls vaccinated |
|----|------------------------|------|---------------------|--------------------|----------------|-------------------|------------------|---------------------------|--------------------------|-------------------------|------------|------------------------------------------------|
| 1  | AFGHANISTAN            | AF   | 432.0               | 8.6                | 8.0            | 1780              | 1470             | 1200                      | 983                      | 928                     | Very CE    | 516                                            |
| 2  | ALBANIA                | AL   | 25.3                | 1.4                | 1.4            | 89.7              | 35.4             | 8940                      | 5870                     | 5430                    | Very CE    | 444                                            |
| 3  | ALGERIA                | DZ   | 290.0               | 16.1               | 14.5           | 2140              | 1020             | 8720                      | 4250                     | 3830                    | Very CE    | 919                                            |
| 4  | ANGOLA                 | AO   | 269.0               | 8.1                | 4.1            | 5200              | 3320             | 5930                      | 401                      | 374                     | Very CE    | 2420                                           |
| 5  | ARGENTINA              | AR   | 327.0               | 18.1               | 13.7           | 5010              | 2360             | 17700                     | 1030                     | 971                     | Very CE    | 1910                                           |
| 6  | ARMENIA                | AM   | 17.4                | 0.5                | 0.4            | 156               | 68.1             | 5830                      | 927                      | 865                     | Very CE    | 1130                                           |
| 7  | AUSTRALIA              | AU   | 138.0               | 57.1               | 55.8           | 642               | 308              | 39400                     | 39700                    | 37400                   | Very CE    | 583                                            |
| 8  | AUSTRIA                | AT   | 41.5                | 17.2               | 16.9           | 211               | 114              | 42200                     | 34700                    | 32700                   | Very CE    | 636                                            |
| 9  | AZERBAIJAN             | AZ   | 48.3                | 1.5                | 1.2            | 322               | 148              | 10100                     | 1640                     | 1510                    | Very CE    | 833                                            |
| 10 | BAHAMAS                | BS   | 2.6                 | 1.1                | 1.0            | 43                | 17.3             | 32200                     | 13100                    | 12000                   | Very CE    | 2090                                           |
| 11 | BAHRAIN                | BH   | 8.0                 | 3.3                | 3.3            | 49.7              | 10.5             | 23700                     | 126000                   | 101000                  | Not CE     | 776                                            |
| 12 | BANGLADESH             | BD   | 1560.0              | 31.1               | 25.9           | 17700             | 11800            | 1790                      | 537                      | 500                     | Very CE    | 1420                                           |
| 13 | BARBADOS               | BB   | 1.6                 | 0.7                | 0.6            | 26.9              | 10.6             | 19300                     | 9070                     | 8360                    | Very CE    | 2080                                           |
| 14 | BELARUS                | BY   | 43.7                | 2.4                | 2.2            | 425               | 172              | 15000                     | 1860                     | 1730                    | Very CE    | 1220                                           |
| 15 | BELGIUM                | BE   | 58.2                | 24.1               | 23.5           | 382               | 129              | 38600                     | 41600                    | 38400                   | Very CE    | 821                                            |
| 16 | BELIZE                 | BZ   | 3.8                 | 0.2                | 0.2            | 97.4              | 59.1             | 6720                      | 821                      | 763                     | Very CE    | 3240                                           |
| 17 | BENIN                  | BJ   | 115.0               | 2.3                | 1.3            | 1920              | 1340             | 1630                      | 414                      | 384                     | Very CE    | 2080                                           |
| 18 | BHUTAN                 | BT   | 7.0                 | 0.2                | 0.2            | 51                | 30.4             | 5810                      | 1180                     | 1100                    | Very CE    | 913                                            |
| 19 | BOLIVIA                | BO   | 114.0               | 3.4                | 1.0            | 4350              | 2470             | 5130                      | 264                      | 242                     | Very CE    | 4790                                           |
| 20 | BOSNIA AND HERZEGOVINA | BA   | 20.0                | 1.1                | 1.0            | 200               | 55.9             | 9090                      | 4200                     | 3640                    | Very CE    | 1250                                           |
| 21 | BOTSWANA               | BW   | 21.1                | 1.2                | 0.9            | 395               | 226              | 14800                     | 1260                     | 1140                    | Very CE    | 2330                                           |
| 22 | BRAZIL                 | BR   | 1710.0              | 94.9               | 73.4           | 24100             | 12200            | 11700                     | 1370                     | 1290                    | Very CE    | 1760                                           |
| 23 | BRUNEI DARUSSALAM      | BN   | 3.1                 | 1.3                | 1.2            | 42.6              | 19.2             | 50500                     | 13800                    | 13000                   | Very CE    | 1710                                           |

|    |                                       |    |        |       |       |       |       |       |       |       |         |      |
|----|---------------------------------------|----|--------|-------|-------|-------|-------|-------|-------|-------|---------|------|
| 24 | BULGARIA                              | BG | 30.8   | 1.7   | 1.3   | 548   | 191   | 14600 | 1120  | 1040  | Very CE | 2230 |
| 25 | BURKINA FASO                          | BF | 216.0  | 4.3   | 3.1   | 2810  | 2400  | 1310  | 358   | 338   | Very CE | 1620 |
| 26 | BURUNDI                               | BI | 97.5   | 2.0   | 1.1   | 2660  | 2270  | 608   | 158   | 150   | Very CE | 3410 |
| 27 | CAMBODIA                              | KH | 146.0  | 2.9   | 2.0   | 2420  | 1560  | 2370  | 441   | 410   | Very CE | 2070 |
| 28 | CAMEROON                              | CM | 236.0  | 7.1   | 5.1   | 3110  | 1890  | 2380  | 624   | 581   | Very CE | 1650 |
| 29 | CANADA                                | CA | 182.0  | 75.6  | 73.4  | 866   | 370   | 40400 | 38200 | 36000 | Very CE | 594  |
| 30 | CAPE VERDE                            | CV | 5.3    | 0.3   | 0.2   | 150   | 78.1  | 4120  | 955   | 873   | Very CE | 3540 |
| 31 | CENTRAL AFRICAN REPUBLIC              | CF | 55.8   | 1.1   | 0.9   | 459   | 344   | 816   | 695   | 651   | Very CE | 1030 |
| 32 | CHAD                                  | TD | 149.0  | 3.0   | 2.3   | 1200  | 966   | 1530  | 635   | 597   | Very CE | 1000 |
| 33 | CHILE                                 | CL | 126.0  | 7.0   | 5.6   | 1370  | 788   | 17300 | 1830  | 1710  | Very CE | 1360 |
| 34 | CHINA                                 | CN | 8210.0 | 455.0 | 419.0 | 39600 | 25000 | 8470  | 3440  | 3210  | Very CE | 603  |
| 35 | COLOMBIA                              | CO | 430.0  | 23.9  | 19.7  | 6970  | 3690  | 10100 | 1400  | 1310  | Very CE | 2020 |
| 36 | COMOROS                               | KM | 9.1    | 0.2   | 0.0   | 342   | 241   | 1120  | 96.9  | 91.2  | Very CE | 4690 |
| 37 | CONGO                                 | CG | 49.5   | 1.5   | 1.0   | 684   | 366   | 4430  | 982   | 896   | Very CE | 1730 |
| 38 | CONGO, THE DEMOCRATIC REPUBLIC OF THE | CD | 905.0  | 18.1  | 13.4  | 14100 | 12000 | 375   | 312   | 295   | Very CE | 1950 |
| 39 | COSTA RICA                            | CR | 39.3   | 2.2   | 1.9   | 372   | 223   | 12200 | 2240  | 2080  | Very CE | 1180 |
| 40 | CÔTE D'IVOIRE                         | CI | 250.0  | 7.5   | 5.4   | 3120  | 2270  | 1800  | 741   | 692   | Very CE | 1560 |
| 41 | CROATIA                               | HR | 22.2   | 9.2   | 9.1   | 178   | 76.9  | 20000 | 22800 | 21500 | CE      | 1000 |
| 42 | CUBA                                  | CU | 67.2   | 2.0   | 1.1   | 840   | 421   | 12100 | 661   | 629   | Very CE | 1560 |
| 43 | CYPRUS                                | CY | 6.5    | 2.7   | 2.7   | 28.5  | 21.4  | 32100 | 63000 | 56600 | CE      | 545  |
| 44 | CZECH REPUBLIC                        | CZ | 43.2   | 17.9  | 17.6  | 478   | 157   | 26000 | 22800 | 21200 | Very CE | 1380 |
| 45 | DENMARK                               | DK | 33.2   | 13.8  | 13.3  | 261   | 76.3  | 41000 | 33500 | 30900 | Very CE | 982  |
| 46 | DJIBOUTI                              | DJ | 10.0   | 0.3   | 0.2   | 119   | 83.8  | 2290  | 759   | 711   | Very CE | 1480 |
| 47 | DOMINICAN REPUBLIC                    | DO | 98.3   | 5.5   | 4.2   | 2170  | 1110  | 9860  | 1070  | 980   | Very CE | 2760 |
| 48 | ECUADOR                               | EC | 143.0  | 7.9   | 4.9   | 3960  | 2430  | 8490  | 725   | 673   | Very CE | 3460 |
| 49 | EGYPT                                 | EG | 804.0  | 44.6  | 43.4  | 1650  | 876   | 6320  | 13900 | 12600 | CE      | 257  |
| 50 | EL SALVADOR                           | SV | 67.5   | 3.7   | 3.3   | 1090  | 706   | 6880  | 829   | 780   | Very CE | 2030 |

|    |                           |    |         |       |       |        |        |       |        |        |         |      |
|----|---------------------------|----|---------|-------|-------|--------|--------|-------|--------|--------|---------|------|
| 51 | EQUATORIAL GUINEA         | GQ | 8.2     | 3.4   | 3.3   | 97.9   | 57.8   | 36500 | 11200  | 10300  | Very CE | 1500 |
| 52 | ERITREA                   | ER | 63.6    | 1.3   | 0.9   | 820    | 668    | 589   | 404    | 381    | Very CE | 1610 |
| 53 | ESTONIA                   | EE | 6.0     | 2.5   | 2.4   | 88.7   | 29     | 21900 | 15400  | 13700  | Very CE | 1860 |
| 54 | ETHIOPIA                  | ET | 1110.0  | 22.2  | 17.3  | 14800  | 10700  | 1120  | 430    | 402    | Very CE | 1660 |
| 55 | FIJI                      | FJ | 7.6     | 0.4   | 0.2   | 202    | 135    | 4790  | 555    | 519    | Very CE | 3340 |
| 56 | FINLAND                   | FI | 28.6    | 11.9  | 11.7  | 93.3   | 36.5   | 38100 | 57400  | 53800  | CE      | 408  |
| 57 | FRANCE                    | FR | 369.0   | 153.0 | 150.0 | 2110   | 946    | 35000 | 31700  | 29900  | Very CE | 715  |
| 58 | GABON                     | GA | 17.1    | 1.0   | 0.8   | 210    | 94.2   | 16000 | 1710   | 1560   | Very CE | 1530 |
| 59 | GAMBIA                    | GM | 23.2    | 0.5   | 0.2   | 503    | 377    | 2140  | 514    | 468    | Very CE | 2720 |
| 60 | GEORGIA                   | GE | 20.4    | 0.6   | 0.5   | 202    | 97.2   | 5500  | 917    | 857    | Very CE | 1240 |
| 61 | GERMANY                   | DE | 378.0   | 157.0 | 154.0 | 2390   | 714    | 39200 | 45900  | 42300  | CE      | 789  |
| 62 | GHANA                     | GH | 281.0   | 8.4   | 3.9   | 6970   | 4060   | 1880  | 476    | 436    | Very CE | 3100 |
| 63 | GREECE                    | GR | 51.7    | 21.5  | 21.2  | 224    | 118    | 26900 | 35900  | 34000  | CE      | 541  |
| 64 | GRENADA                   | GD | 0.9     | 0.1   | 0.0   | 10.1   | 5.08   | 11200 | 1690   | 1580   | Very CE | 1370 |
| 65 | GUATEMALA                 | GT | 186.0   | 10.3  | 8.7   | 2500   | 1730   | 4960  | 822    | 772    | Very CE | 1680 |
| 66 | GUINEA                    | GN | 125.0   | 2.5   | 1.7   | 2570   | 1970   | 1130  | 294    | 275    | Very CE | 2560 |
| 67 | GUINEA-BISSAU             | GW | 18.7    | 0.4   | 0.3   | 267    | 204    | 1250  | 425    | 396    | Very CE | 1790 |
| 68 | GUYANA                    | GY | 9.3     | 0.3   | 0.1   | 303    | 170    | 3440  | 326    | 303    | Very CE | 4060 |
| 69 | HAITI                     | HT | 115.0   | 2.3   | 1.7   | 1730   | 1350   | 1180  | 585    | 530    | Very CE | 1880 |
| 70 | HONDURAS                  | HN | 89.0    | 2.7   | 1.9   | 1660   | 1000   | 4070  | 408    | 382    | Very CE | 2330 |
| 71 | HUNGARY                   | HU | 47.1    | 19.5  | 18.9  | 591    | 230    | 21600 | 12800  | 11600  | Very CE | 1570 |
| 72 | ICELAND                   | IS | 2.1     | 0.9   | 0.9   | 7.74   | 2.23   | 36100 | 411000 | 271000 | Not CE  | 457  |
| 73 | INDIA                     | IN | 11700.0 | 352.0 | 280.0 | 183000 | 116000 | 3650  | 546    | 509    | Very CE | 1950 |
| 74 | INDONESIA                 | ID | 2110.0  | 63.2  | 46.8  | 25300  | 13900  | 4670  | 1000   | 929    | Very CE | 1500 |
| 75 | IRAN, ISLAMIC REPUBLIC OF | IR | 509.0   | 28.2  | 27.6  | 1390   | 707    | 11500 | 10800  | 9940   | Very CE | 341  |
| 76 | IRAQ                      | IQ | 406.0   | 22.5  | 21.7  | 950    | 582    | 3890  | 9880   | 9080   | CE      | 293  |
| 77 | IRELAND                   | IE | 28.3    | 11.8  | 11.3  | 267    | 87.4   | 41500 | 20700  | 19300  | Very CE | 1180 |
| 78 | ISRAEL                    | IL | 62.5    | 25.9  | 25.7  | 261    | 190    | 27800 | 28300  | 27000  | Very CE | 521  |

|     |                                                     |    |       |       |       |       |      |       |       |       |         |      |
|-----|-----------------------------------------------------|----|-------|-------|-------|-------|------|-------|-------|-------|---------|------|
| 79  | ITALY                                               | IT | 273.0 | 113.0 | 111.0 | 1520  | 558  | 32900 | 40800 | 38100 | CE      | 698  |
| 80  | JAMAICA                                             | JM | 28.0  | 1.6   | 1.2   | 525   | 295  | 8060  | 926   | 867   | Very CE | 2340 |
| 81  | JAPAN                                               | JP | 564.0 | 234.0 | 227.0 | 4550  | 1800 | 34300 | 21200 | 20100 | Very CE | 1010 |
| 82  | JORDAN                                              | JO | 72.4  | 4.0   | 3.9   | 147   | 77.7 | 6010  | 11700 | 10800 | CE      | 253  |
| 83  | KAZAKHSTAN                                          | KZ | 105.0 | 5.8   | 4.6   | 1980  | 805  | 13200 | 1100  | 1000  | Very CE | 2360 |
| 84  | KENYA                                               | KE | 509.0 | 10.2  | 3.1   | 12800 | 7510 | 1720  | 240   | 222   | Very CE | 3130 |
| 85  | KOREA,<br>DEMOCRATIC<br>PEOPLE'S<br>REPUBLIC OF     | KP | 191.0 | 3.8   | 2.8   | 1440  | 892  | 7360  | 483   | 457   | Very CE | 942  |
| 86  | KOREA,<br>REPUBLIC OF                               | KR | 273.0 | 113.0 | 112.0 | 1780  | 656  | 30300 | 39300 | 35300 | CE      | 811  |
| 87  | KUWAIT                                              | KW | 21.2  | 8.8   | 8.7   | 85    | 46.4 | 54700 | 37500 | 35200 | Very CE | 502  |
| 88  | KYRGYZSTAN                                          | KG | 48.0  | 1.0   | 0.7   | 745   | 420  | 2420  | 348   | 325   | Very CE | 1940 |
| 89  | LAO PEOPLE'S<br>DEMOCRATIC<br>REPUBLIC              | LA | 71.7  | 2.2   | 1.9   | 562   | 374  | 2810  | 1190  | 1110  | Very CE | 980  |
| 90  | LATVIA                                              | LV | 9.1   | 0.5   | 0.4   | 117   | 55   | 17700 | 1360  | 1260  | Very CE | 1620 |
| 91  | LEBANON                                             | LB | 36.5  | 2.0   | 1.9   | 164   | 77.5 | 14700 | 6760  | 6180  | Very CE | 563  |
| 92  | LESOTHO                                             | LS | 26.6  | 0.8   | 0.5   | 402   | 270  | 1720  | 720   | 657   | Very CE | 1890 |
| 93  | LIBERIA                                             | LR | 50.9  | 1.0   | 0.7   | 849   | 703  | 577   | 325   | 305   | Very CE | 2090 |
| 94  | LIBYAN ARAB<br>JAMAHIRIYA                           | LY | 57.8  | 3.2   | 2.7   | 598   | 296  | 16900 | 3310  | 3020  | Very CE | 1290 |
| 95  | LITHUANIA                                           | LT | 15.6  | 0.9   | 0.6   | 301   | 111  | 20400 | 1050  | 959   | Very CE | 2410 |
| 96  | LUXEMBOURG                                          | LU | 3.1   | 1.3   | 1.2   | 23.1  | 13.1 | 90000 | 36100 | 33900 | Very CE | 941  |
| 97  | MACEDONIA, THE<br>FORMER<br>YUGOSLAV<br>REPUBLIC OF | MK | 12.1  | 0.7   | 0.6   | 120   | 64.2 | 11700 | 2030  | 1890  | Very CE | 1240 |
| 98  | MADAGASCAR                                          | MG | 278.0 | 5.6   | 2.9   | 8380  | 5440 | 972   | 160   | 150   | Very CE | 3770 |
| 99  | MALAWI                                              | MW | 199.0 | 4.0   | 1.9   | 6150  | 4150 | 918   | 117   | 110   | Very CE | 3870 |
| 100 | MALAYSIA                                            | MY | 283.0 | 15.7  | 12.6  | 3390  | 1190 | 15600 | 2790  | 2520  | Very CE | 1500 |
| 101 | MALDIVES                                            | MV | 2.8   | 0.2   | 0.1   | 25    | 15   | 8930  | 3210  | 2910  | Very CE | 1110 |

|     |                                       |    |        |      |      |       |       |       |        |        |         |      |
|-----|---------------------------------------|----|--------|------|------|-------|-------|-------|--------|--------|---------|------|
| 102 | MALI                                  | ML | 206.0  | 4.1  | 2.0  | 5030  | 3860  | 1100  | 190    | 179    | Very CE | 3050 |
| 103 | MALTA                                 | MT | 2.1    | 0.9  | 0.9  | 4.99  | 1.49  | 27300 | 208000 | 192000 | Not CE  | 291  |
| 104 | MAURITANIA                            | MR | 41.9   | 0.8  | 0.4  | 773   | 534   | 2570  | 358    | 332    | Very CE | 2300 |
| 105 | MAURITIUS                             | MU | 9.9    | 0.5  | 0.4  | 145   | 101   | 14500 | 1600   | 1470   | Very CE | 1840 |
| 106 | MEXICO                                | MX | 1060.0 | 59.0 | 41.1 | 20100 | 9370  | 15300 | 1240   | 1140   | Very CE | 2360 |
| 107 | MICRONESIA,<br>FEDERATED<br>STATES OF | FM | 5.4    | 0.3  | 0.3  | 34.8  | 4.95  | 3440  | 21000  | 15100  | Not CE  | 810  |
| 108 | MOLDOVA,<br>REPUBLIC OF               | MD | 17.8   | 0.5  | 0.4  | 268   | 128   | 3390  | 559    | 523    | Very CE | 1880 |
| 109 | MONGOLIA                              | MN | 22.4   | 0.7  | 0.4  | 380   | 176   | 4760  | 731    | 674    | Very CE | 2120 |
| 110 | MONTENEGRO                            | ME | 4.0    | 0.2  | 0.2  | 54.1  | 19.7  | 13600 | 1500   | 1370   | Very CE | 1690 |
| 111 | MOROCCO                               | MA | 288.0  | 16.0 | 13.2 | 3840  | 2280  | 4990  | 1700   | 1560   | Very CE | 1660 |
| 112 | MOZAMBIQUE                            | MZ | 313.0  | 6.3  | 1.5  | 8630  | 6790  | 982   | 101    | 96.1   | Very CE | 3440 |
| 113 | MYANMAR                               | MM | 416.0  | 8.3  | 4.8  | 5150  | 3600  | 7360  | 423    | 394    | Very CE | 1550 |
| 114 | NAMIBIA                               | NA | 362.0  | 20.1 | 17.6 | 3210  | 1660  | 6830  | 2470   | 2260   | Very CE | 1110 |
| 115 | NEPAL                                 | NP | 359.0  | 7.2  | 5.7  | 5010  | 3500  | 1260  | 370    | 346    | Very CE | 1740 |
| 116 | NETHERLANDS                           | NL | 98.0   | 40.7 | 39.8 | 541   | 197   | 42800 | 39700  | 37200  | Very CE | 689  |
| 117 | NEW ZEALAND                           | NZ | 28.4   | 11.8 | 11.7 | 99.1  | 39.8  | 29900 | 67600  | 62300  | CE      | 436  |
| 118 | NICARAGUA                             | NI | 63.9   | 1.9  | 1.2  | 1690  | 1130  | 2940  | 284    | 265    | Very CE | 3300 |
| 119 | NIGER                                 | NE | 213.0  | 4.3  | 3.9  | 1010  | 859   | 732   | 825    | 785    | CE      | 590  |
| 120 | NIGERIA                               | NG | 1960.0 | 58.8 | 40.3 | 28700 | 18200 | 2530  | 737    | 681    | Very CE | 1830 |
| 121 | NORWAY                                | NO | 30.2   | 12.5 | 12.1 | 227   | 91.9  | 61900 | 26900  | 25200  | Very CE | 940  |
| 122 | OMAN                                  | OM | 22.4   | 9.3  | 9.2  | 118   | 66.6  | 28900 | 36900  | 34200  | CE      | 662  |
| 123 | PAKISTAN                              | PK | 1960.0 | 58.8 | 55.0 | 10400 | 6770  | 2760  | 1590   | 1490   | Very CE | 662  |
| 124 | PANAMA                                | PA | 33.0   | 1.8  | 1.5  | 501   | 274   | 15700 | 1340   | 1240   | Very CE | 1900 |
| 125 | PAPUA NEW<br>GUINEA                   | PG | 82.5   | 2.5  | 1.5  | 1790  | 1220  | 2700  | 269    | 256    | Very CE | 2720 |
| 126 | PARAGUAY                              | PY | 69.7   | 3.9  | 3.1  | 1790  | 1130  | 5420  | 657    | 615    | Very CE | 3210 |
| 127 | PERU                                  | PE | 284.0  | 15.7 | 9.9  | 7650  | 3530  | 10300 | 852    | 775    | Very CE | 3370 |
| 128 | PHILIPPINES                           | PH | 1060.0 | 58.7 | 53.1 | 10800 | 6300  | 4140  | 1700   | 1590   | Very CE | 1270 |

|     |                                  |    |       |       |       |      |      |       |               |       |         |      |
|-----|----------------------------------|----|-------|-------|-------|------|------|-------|---------------|-------|---------|------|
| 129 | POLAND                           | PL | 180.0 | 74.6  | 73.1  | 1810 | 992  | 21300 | 14100         | 13200 | Very CE | 1260 |
| 130 | PORTUGAL                         | PT | 53.6  | 22.3  | 21.9  | 420  | 241  | 25400 | 18100         | 17200 | Very CE | 978  |
| 131 | QATAR                            | QA | 7.5   | 3.1   | 3.1   | 34.5 | 0    | 88900 | #NAME? 783000 |       | Not CE  | 577  |
| 132 | ROMANIA                          | RO | 107.0 | 5.9   | 4.0   | 2370 | 1070 | 15200 | 831           | 773   | Very CE | 2770 |
| 133 | RUSSIAN FEDERATION               | RU | 632.0 | 35.0  | 29.1  | 6630 | 3230 | 21200 | 1470          | 1370  | Very CE | 1310 |
| 134 | RWANDA                           | RW | 132.0 | 2.6   | 0.9   | 3200 | 2110 | 1250  | 196           | 184   | Very CE | 3030 |
| 135 | SAINT LUCIA                      | LC | 1.5   | 0.1   | 0.1   | 16.1 | 8    | 9380  | 1740          | 1630  | Very CE | 1350 |
| 136 | SAINT VINCENT AND THE GRENADINES | VC | 1.0   | 0.1   | 0.0   | 10.4 | 5.08 | 10800 | 1800          | 1670  | Very CE | 1330 |
| 137 | SAMOA                            | WS | 2.2   | 0.1   | 0.1   | 24   | 5.31 | 4570  | 4550          | 3840  | Very CE | 1350 |
| 138 | SAO TOME AND PRINCIPE            | ST | 2.1   | 0.1   | 0.0   | 55   | 39.1 | 2060  | 300           | 282   | Very CE | 3250 |
| 139 | SAUDI ARABIA                     | SA | 245.0 | 102.0 | 101.0 | 634  | 319  | 24400 | 88700         | 81200 | Not CE  | 324  |
| 140 | SENEGAL                          | SN | 162.0 | 4.9   | 2.5   | 4440 | 3030 | 1980  | 319           | 298   | Very CE | 3430 |
| 141 | SERBIA                           | RS | 55.7  | 3.1   | 2.5   | 954  | 395  | 11900 | 1300          | 1190  | Very CE | 2140 |
| 142 | SIERRA LEONE                     | SL | 76.9  | 1.5   | 1.2   | 1090 | 945  | 877   | 370           | 348   | Very CE | 1770 |
| 143 | SINGAPORE                        | SG | 33.9  | 14.1  | 13.5  | 315  | 144  | 61100 | 26100         | 24500 | Very CE | 1160 |
| 144 | SLOVAKIA                         | SK | 26.4  | 11.0  | 10.7  | 331  | 138  | 24000 | 14200         | 13100 | Very CE | 1560 |
| 145 | SLOVENIA                         | SI | 8.9   | 3.7   | 3.6   | 68.2 | 34.1 | 27400 | 23200         | 21700 | Very CE | 964  |
| 146 | SOLOMON ISLANDS                  | SB | 6.3   | 0.2   | 0.1   | 126  | 94.7 | 2940  | 332           | 314   | Very CE | 2500 |
| 147 | SOMALIA                          | SO | 121.0 | 2.4   | 0.7   | 2070 | 1290 | 11100 | 323           | 299   | Very CE | 2130 |
| 148 | SOUTH AFRICA                     | ZA | 498.0 | 27.6  | 21.9  | 7360 | 4750 | 11000 | 1020          | 944   | Very CE | 1850 |
| 149 | SPAIN                            | ES | 210.0 | 87.1  | 85.8  | 1250 | 426  | 32400 | 33800         | 31800 | Very CE | 743  |
| 150 | SRI LANKA                        | LK | 157.0 | 4.7   | 4.1   | 1480 | 653  | 5620  | 2010          | 1820  | Very CE | 1170 |
| 151 | SUDAN                            | SD | 537.0 | 16.1  | 14.3  | 2910 | 2060 | 2140  | 2280          | 2100  | Very CE | 678  |
| 152 | SURINAME                         | SR | 5.1   | 0.3   | 0.2   | 152  | 83.4 | 7890  | 721           | 666   | Very CE | 3720 |
| 153 | SWAZILAND                        | SZ | 14.7  | 0.8   | 0.6   | 317  | 205  | 6100  | 1000          | 907   | Very CE | 2700 |
| 154 | SWEDEN                           | SE | 47.0  | 19.5  | 19.0  | 281  | 128  | 41300 | 36700         | 34100 | Very CE | 747  |

|     |                                    |    |        |       |       |       |       |       |        |        |         |      |
|-----|------------------------------------|----|--------|-------|-------|-------|-------|-------|--------|--------|---------|------|
| 155 | SWITZERLAND                        | CH | 38.9   | 16.1  | 15.9  | 105   | 52.5  | 49200 | 76100  | 70800  | CE      | 336  |
| 156 | SYRIAN ARAB<br>REPUBLIC            | SY | 245.0  | 13.6  | 13.3  | 597   | 342   | 5260  | 9490   | 8820   | CE      | 304  |
| 157 | TAJIKISTAN                         | TJ | 81.6   | 1.6   | 1.5   | 512   | 291   | 2340  | 848    | 795    | Very CE | 784  |
| 158 | TANZANIA,<br>UNITED<br>REPUBLIC OF | TZ | 579.0  | 11.6  | 3.6   | 18200 | 11700 | 1520  | 188    | 174    | Very CE | 3930 |
| 159 | THAILAND                           | TH | 484.0  | 26.8  | 22.7  | 5400  | 3100  | 8700  | 1170   | 1110   | Very CE | 1400 |
| 160 | TIMOR-LESTE                        | TL | 15.9   | 0.5   | 0.4   | 161   | 121   | 1590  | 1350   | 1250   | Very CE | 1270 |
| 161 | TOGO                               | TG | 75.4   | 1.5   | 1.1   | 1040  | 725   | 1040  | 488    | 454    | Very CE | 1730 |
| 162 | TONGA                              | TO | 1.2    | 0.1   | 0.1   | 6.41  | 3.32  | 4670  | 3410   | 3160   | Very CE | 683  |
| 163 | TRINIDAD AND<br>TOBAGO             | TT | 8.8    | 3.6   | 3.4   | 186   | 108   | 26000 | 8140   | 7590   | Very CE | 2650 |
| 164 | TUNISIA                            | TN | 76.3   | 4.2   | 4.1   | 364   | 169   | 9420  | 6500   | 5970   | Very CE | 596  |
| 165 | TURKEY                             | TR | 628.0  | 34.8  | 32.7  | 2510  | 1270  | 17500 | 6130   | 5670   | Very CE | 500  |
| 166 | TURKMENISTAN                       | TM | 46.3   | 2.6   | 2.3   | 400   | 203   | 9180  | 2580   | 2370   | Very CE | 1080 |
| 167 | UGANDA                             | UG | 468.0  | 9.4   | 4.6   | 10700 | 6960  | 1350  | 217    | 203    | Very CE | 2860 |
| 168 | UKRAINE                            | UA | 192.0  | 5.8   | 4.8   | 2130  | 907   | 7250  | 695    | 649    | Very CE | 1390 |
| 169 | UNITED ARAB<br>EMIRATES            | AE | 43.3   | 18.0  | 17.5  | 400   | 10    | 48200 | 178000 | 122000 | CE      | 1150 |
| 170 | UNITED<br>KINGDOM                  | GB | 341.0  | 141.0 | 139.0 | 1640  | 619   | 35500 | 37800  | 35400  | Very CE | 602  |
| 171 | UNITED STATES                      | US | 1980.0 | 820.0 | 803.0 | 9530  | 5450  | 48400 | 25800  | 24500  | Very CE | 602  |
| 172 | URUGUAY                            | UY | 25.1   | 1.4   | 1.0   | 344   | 159   | 15200 | 1190   | 1110   | Very CE | 1710 |
| 173 | UZBEKISTAN                         | UZ | 258.0  | 7.7   | 6.9   | 2380  | 1300  | 3310  | 1020   | 950    | Very CE | 1150 |
| 174 | VANUATU                            | VU | 2.8    | 0.2   | 0.1   | 19.7  | 6.97  | 4630  | 2140   | 1980   | Very CE | 873  |
| 175 | VENEZUELA                          | VE | 273.0  | 15.2  | 9.4   | 6500  | 3390  | 12800 | 723    | 672    | Very CE | 2970 |
| 176 | VIET NAM                           | VN | 638.0  | 19.1  | 17.2  | 5010  | 2900  | 3440  | 1180   | 1100   | Very CE | 981  |
| 177 | YEMEN                              | YE | 316.0  | 9.5   | 9.1   | 829   | 610   | 2350  | 4740   | 4380   | CE      | 328  |
| 178 | ZAMBIA                             | ZM | 177.0  | 5.3   | 2.5   | 4330  | 2830  | 1620  | 267    | 250    | Very CE | 3060 |
| 179 | ZIMBABWE                           | ZW | 157.0  | 3.1   | 1.1   | 3650  | 2440  | 2360  | 297    | 275    | Very CE | 2910 |
| 180 | UZBEKISTAN                         | UZ | 587.0  | 17.6  | 14.8  | 4830  | 2580  | 3310  | 1181   | 1110   | Very CE | 1028 |



|     |           |    |        |      |      |                |                |       |      |      |         |      |
|-----|-----------|----|--------|------|------|----------------|----------------|-------|------|------|---------|------|
| 181 | VANUATU   | VU | 7.0    | 0.4  | 0.3  | 90.1           | 59.4           | 4631  | 1252 | 1177 | Very CE | 1608 |
| 182 | VENEZUELA | VE | 598.0  | 33.2 | 21.4 | 15800          | 8660           | 12836 | 639  | 602  | Very CE | 3297 |
| 183 | VIET NAM  | VN | 1467.0 | 44.0 | 35.8 | 12600          | 7920           | 3435  | 1078 | 1009 | Very CE | 1078 |
| 184 | YEMEN     | YE | 919.0  | 27.6 | 26.1 | 2360           | 1660           | 2349  | 4951 | 4580 | CE      | 321  |
| 185 | ZAMBIA    | ZM | 600.0  | 18.0 | 10.8 | 13100          | 9860           | 1623  | 339  | 318  | Very CE | 2725 |
| 186 | ZIMBABWE  | ZW | 374.0  | 7.5  | 3.7  | 6797.1479<br>6 | 5068.5<br>3222 | 2363  | 280  | 262  | Very CE | 2272 |

## Appendix 5. Quality of parameters informing PRIME

|    | Country                | Code | WHO Region | Data quality: (S)atisfactory or (U)nsatisfactory |                                    |                           |                           | Number of "Satisfactory" ratings |
|----|------------------------|------|------------|--------------------------------------------------|------------------------------------|---------------------------|---------------------------|----------------------------------|
|    |                        |      |            | HPV type distribution in cervical cancer         | Cervical cancer stage at diagnosis | Cervical cancer incidence | Cervical cancer mortality |                                  |
| 1  | AFGHANISTAN            | AF   | EMRO       | U                                                | U                                  | U                         | U                         | 0                                |
| 2  | ALBANIA                | AL   | EURO       | U                                                | U                                  | U                         | S                         | 1                                |
| 3  | ALGERIA                | DZ   | AFRO       | S                                                | U                                  | S                         | U                         | 2                                |
| 4  | ANDORRA                | AD   | EURO       | U                                                | U                                  | U                         | U                         | 0                                |
| 5  | ANGOLA                 | AO   | AFRO       | U                                                | U                                  | U                         | U                         | 0                                |
| 6  | ANTIGUA AND BARBUDA    | AG   | AMRO       | U                                                | U                                  | U                         | U                         | 0                                |
| 7  | ARGENTINA              | AR   | AMRO       | S                                                | S                                  | S                         | S                         | 4                                |
| 8  | ARMENIA                | AM   | EURO       | U                                                | U                                  | U                         | S                         | 1                                |
| 9  | AUSTRALIA              | AU   | WPRO       | S                                                | S                                  | S                         | S                         | 4                                |
| 10 | AUSTRIA                | AT   | EURO       | S                                                | S                                  | S                         | S                         | 4                                |
| 11 | AZERBAIJAN             | AZ   | EURO       | U                                                | U                                  | U                         | S                         | 1                                |
| 12 | BAHAMAS                | BS   | AMRO       | U                                                | U                                  | U                         | S                         | 1                                |
| 13 | BAHRAIN                | BH   | EMRO       | U                                                | U                                  | S                         | S                         | 2                                |
| 14 | BANGLADESH             | BD   | SEARO      | U                                                | U                                  | U                         | U                         | 0                                |
| 15 | BARBADOS               | BB   | AMRO       | U                                                | U                                  | U                         | S                         | 1                                |
| 16 | BELARUS                | BY   | EURO       | S                                                | U                                  | S                         | S                         | 3                                |
| 17 | BELGIUM                | BE   | EURO       | S                                                | U                                  | S                         | S                         | 3                                |
| 18 | BELIZE                 | BZ   | AMRO       | U                                                | U                                  | U                         | S                         | 1                                |
| 19 | BENIN                  | BJ   | AFRO       | S                                                | U                                  | U                         | U                         | 1                                |
| 20 | BHUTAN                 | BT   | SEARO      | U                                                | U                                  | S                         | U                         | 1                                |
| 21 | BOLIVIA                | BO   | AMRO       | S                                                | U                                  | U                         | U                         | 1                                |
| 22 | BOSNIA AND HERZEGOVINA | BA   | EURO       | U                                                | U                                  | S                         | S                         | 2                                |
| 23 | BOTSWANA               | BW   | AFRO       | U                                                | U                                  | S                         | U                         | 1                                |
| 24 | BRAZIL                 | BR   | AMRO       | S                                                | S                                  | S                         | S                         | 4                                |
| 25 | BRUNEI DARUSSALAM      | BN   | WPRO       | U                                                | U                                  | U                         | S                         | 1                                |
| 26 | BULGARIA               | BG   | EURO       | U                                                | U                                  | S                         | S                         | 2                                |
| 27 | BURKINA FASO           | BF   | AFRO       | U                                                | U                                  | U                         | U                         | 0                                |
| 28 | BURUNDI                | BI   | AFRO       | U                                                | U                                  | U                         | U                         | 0                                |
| 29 | CAMBODIA               | KH   | WPRO       | U                                                | U                                  | U                         | U                         | 0                                |
| 30 | CAMEROON               | CM   | AFRO       | U                                                | U                                  | U                         | U                         | 0                                |
| 31 | CANADA                 | CA   | AMRO       | S                                                | S                                  | S                         | S                         | 4                                |

|    |                                             |    |      |   |   |   |   |   |
|----|---------------------------------------------|----|------|---|---|---|---|---|
| 32 | CAPE VERDE                                  | CV | AFRO | U | U | U | U | 0 |
| 33 | CENTRAL AFRICAN<br>REPUBLIC                 | CF | AFRO | U | U | U | U | 0 |
| 34 | CHAD                                        | TD | AFRO | U | U | U | U | 0 |
| 35 | CHILE                                       | CL | AMRO | S | S | S | S | 4 |
| 36 | CHINA                                       | CN | WPRO | S | S | S | S | 4 |
| 37 | COLOMBIA                                    | CO | AMRO | S | U | S | S | 3 |
| 38 | COMOROS                                     | KM | AFRO | U | U | U | U | 0 |
| 39 | CONGO                                       | CG | AFRO | U | U | U | U | 0 |
| 40 | CONGO, THE<br>DEMOCRATIC<br>REPUBLIC OF THE | CD | AFRO | U | U | U | U | 0 |
| 41 | COSTA RICA                                  | CR | AMRO | U | U | U | U | 0 |
| 42 | CÔTE D'IVOIRE                               | CI | AFRO | S | U | S | S | 3 |
| 43 | CROATIA                                     | HR | EURO | U | U | U | U | 0 |
| 44 | CUBA                                        | CU | AMRO | S | S | S | S | 4 |
| 45 | CYPRUS                                      | CY | EURO | S | U | S | S | 3 |
| 46 | CZECH REPUBLIC                              | CZ | EURO | U | U | S | S | 2 |
| 47 | DENMARK                                     | DK | EURO | S | S | S | S | 4 |
| 48 | DJIBOUTI                                    | DJ | EMRO | S | U | S | S | 3 |
| 49 | DOMINICA                                    | DM | AMRO | U | U | U | U | 0 |
| 50 | DOMINICAN REPUBLIC                          | DO | AMRO | U | U | U | U | 0 |
| 51 | ECUADOR                                     | EC | AMRO | U | U | U | S | 1 |
| 52 | EGYPT                                       | EG | EMRO | U | U | S | S | 2 |
| 53 | EL SALVADOR                                 | SV | AMRO | U | U | S | U | 1 |
| 54 | EQUATORIAL GUINEA                           | GQ | AFRO | U | U | U | S | 1 |
| 55 | ERITREA                                     | ER | AFRO | U | U | U | U | 0 |
| 56 | ESTONIA                                     | EE | EURO | U | U | U | U | 0 |
| 57 | ETHIOPIA                                    | ET | AFRO | U | U | S | S | 2 |
| 58 | FIJI                                        | FJ | WPRO | S | U | U | U | 1 |
| 59 | FINLAND                                     | FI | EURO | U | U | S | S | 2 |
| 60 | FRANCE                                      | FR | EURO | S | S | S | S | 4 |
| 61 | GABON                                       | GA | AFRO | S | S | S | S | 4 |
| 62 | GAMBIA                                      | GM | AFRO | U | U | U | U | 0 |
| 63 | GEORGIA                                     | GE | EURO | U | U | S | U | 1 |
| 64 | GERMANY                                     | DE | EURO | U | U | U | S | 1 |
| 65 | GHANA                                       | GH | AFRO | S | S | S | S | 4 |
| 66 | GREECE                                      | GR | EURO | U | U | U | U | 0 |
| 67 | GRENADA                                     | GD | AMRO | S | S | U | S | 3 |
| 68 | GUATEMALA                                   | GT | AMRO | U | U | U | U | 0 |
| 69 | GUINEA                                      | GN | AFRO | U | U | U | S | 1 |
| 70 | GUINEA-BISSAU                               | GW | AFRO | S | U | U | U | 1 |
| 71 | GUYANA                                      | GY | AMRO | U | U | U | U | 0 |

|     |                                                  |    |           |   |   |   |   |   |
|-----|--------------------------------------------------|----|-----------|---|---|---|---|---|
| 72  | HAITI                                            | HT | AMRO      | U | U | U | S | 1 |
| 73  | HONDURAS                                         | HN | AMRO      | U | U | U | S | 1 |
| 74  | HUNGARY                                          | HU | EURO      | S | U | U | U | 1 |
| 75  | ICELAND                                          | IS | EURO      | S | U | U | S | 2 |
| 76  | INDIA                                            | IN | SEAR<br>O | S | U | S | S | 3 |
| 77  | INDONESIA                                        | ID | SEAR<br>O | S | S | S | U | 3 |
| 78  | IRAN, ISLAMIC<br>REPUBLIC OF                     | IR | EMRO      | S | S | U | U | 2 |
| 79  | IRAQ                                             | IQ | EMRO      | S | U | S | U | 2 |
| 80  | IRELAND                                          | IE | EURO      | U | U | U | U | 0 |
| 81  | ISRAEL                                           | IL | EURO      | S | U | S | S | 3 |
| 82  | ITALY                                            | IT | EURO      | U | U | S | S | 2 |
| 83  | JAMAICA                                          | JM | AMRO      | S | S | S | S | 4 |
| 84  | JAPAN                                            | JP | WPRO      | S | U | S | S | 3 |
| 85  | JORDAN                                           | JO | EMRO      | S | S | S | S | 4 |
| 86  | KAZAKHSTAN                                       | KZ | EURO      | S | U | S | U | 2 |
| 87  | KENYA                                            | KE | AFRO      | U | U | U | S | 1 |
| 88  | KIRIBATI                                         | KI | WPRO      | S | U | U | U | 1 |
| 89  | KOREA, DEMOCRATIC<br>PEOPLE'S REPUBLIC OF        | KP | SEAR<br>O | U | U | U | U | 0 |
| 90  | KOREA, REPUBLIC OF                               | KR | WPRO      | U | U | U | U | 0 |
| 91  | KUWAIT                                           | KW | EMRO      | S | S | S | S | 4 |
| 92  | KYRGYZSTAN                                       | KG | EURO      | U | U | S | S | 2 |
| 93  | LAO PEOPLE'S<br>DEMOCRATIC<br>REPUBLIC           | LA | WPRO      | U | U | U | S | 1 |
| 94  | LATVIA                                           | LV | EURO      | U | U | U | U | 0 |
| 95  | LEBANON                                          | LB | EMRO      | S | U | S | S | 3 |
| 96  | LESOTHO                                          | LS | AFRO      | U | U | S | U | 1 |
| 97  | LIBERIA                                          | LR | AFRO      | U | U | U | U | 0 |
| 98  | LIBYAN ARAB<br>JAMAHIRIYA                        | LY | EMRO      | U | U | U | U | 0 |
| 99  | LITHUANIA                                        | LT | EURO      | U | U | S | U | 1 |
| 100 | LUXEMBOURG                                       | LU | EURO      | S | U | S | S | 3 |
| 101 | MACEDONIA, THE<br>FORMER YUGOSLAV<br>REPUBLIC OF | MK | EURO      | S | U | S | S | 3 |
| 102 | MADAGASCAR                                       | MG | AFRO      | U | U | U | S | 1 |
| 103 | MALAWI                                           | MW | AFRO      | U | U | U | U | 0 |
| 104 | MALAYSIA                                         | MY | WPRO      | U | U | S | U | 1 |
| 105 | MALDIVES                                         | MV | SEAR<br>O | S | U | S | S | 3 |
| 106 | MALI                                             | ML | AFRO      | U | U | U | U | 0 |
| 107 | MALTA                                            | MT | EURO      | S | U | U | U | 1 |

|     |                                     |    |           |   |   |   |   |   |
|-----|-------------------------------------|----|-----------|---|---|---|---|---|
| 108 | MARSHALL ISLANDS                    | MH | WPRO      | U | U | S | S | 2 |
| 109 | MAURITANIA                          | MR | AFRO      | U | U | U | U | 0 |
| 110 | MAURITIUS                           | MU | AFRO      | U | U | U | U | 0 |
| 111 | MEXICO                              | MX | AMRO      | U | U | S | S | 2 |
| 112 | MICRONESIA,<br>FEDERATED STATES OF  | FM | WPRO      | S | U | U | S | 2 |
| 113 | MOLDOVA, REPUBLIC<br>OF             | MD | EURO      | U | U | U | U | 0 |
| 114 | MONGOLIA                            | MN | WPRO      | U | U | U | S | 1 |
| 115 | MONTENEGRO                          | ME | EURO      | U | U | U | U | 0 |
| 116 | MOROCCO                             | MA | EMRO      | S | U | S | S | 3 |
| 117 | MOZAMBIQUE                          | MZ | AFRO      | U | U | U | U | 0 |
| 118 | MYANMAR                             | MM | SEAR<br>O | S | U | U | U | 1 |
| 119 | NAMIBIA                             | NA | AFRO      | S | U | U | U | 1 |
| 120 | NEPAL                               | NP | SEAR<br>O | U | U | U | U | 0 |
| 121 | NETHERLANDS                         | NL | EURO      | U | U | S | U | 1 |
| 122 | NEW ZEALAND                         | NZ | WPRO      | U | U | U | U | 0 |
| 123 | NICARAGUA                           | NI | AMRO      | S | U | U | U | 1 |
| 124 | NIGER                               | NE | AFRO      | S | S | S | S | 4 |
| 125 | NIGERIA                             | NG | AFRO      | U | U | S | S | 2 |
| 126 | NORWAY                              | NO | EURO      | S | U | U | S | 2 |
| 127 | OMAN                                | OM | EMRO      | U | U | U | U | 0 |
| 128 | PAKISTAN                            | PK | EMRO      | U | S | U | U | 1 |
| 129 | PANAMA                              | PA | AMRO      | U | U | U | U | 0 |
| 130 | PAPUA NEW GUINEA                    | PG | WPRO      | S | U | S | S | 3 |
| 131 | PARAGUAY                            | PY | AMRO      | U | U | S | U | 1 |
| 132 | PERU                                | PE | AMRO      | S | S | U | U | 2 |
| 133 | PHILIPPINES                         | PH | WPRO      | U | U | U | U | 0 |
| 134 | POLAND                              | PL | EURO      | S | U | U | S | 2 |
| 135 | PORTUGAL                            | PT | EURO      | U | U | U | U | 0 |
| 136 | QATAR                               | QA | EMRO      | S | U | U | S | 2 |
| 137 | ROMANIA                             | RO | EURO      | S | S | U | S | 3 |
| 138 | RUSSIAN FEDERATION                  | RU | EURO      | S | U | S | S | 3 |
| 139 | RWANDA                              | RW | AFRO      | S | S | S | S | 4 |
| 140 | SAINT KITTS AND NEVIS               | KN | AMRO      | S | S | S | S | 4 |
| 141 | SAINT LUCIA                         | LC | AMRO      | U | U | S | U | 1 |
| 142 | SAINT VINCENT AND<br>THE GRENADINES | VC | AMRO      | U | U | U | S | 1 |
| 143 | SAMOA                               | WS | WPRO      | S | U | S | S | 3 |
| 144 | SAO TOME AND<br>PRINCIPE            | ST | AFRO      | U | U | U | U | 0 |
| 145 | SAUDI ARABIA                        | SA | EMRO      | U | U | U | U | 0 |

|     |                                 |    |           |   |   |   |   |   |
|-----|---------------------------------|----|-----------|---|---|---|---|---|
| 146 | SENEGAL                         | SN | AFRO      | U | U | U | U | 0 |
| 147 | SERBIA                          | RS | EURO      | U | U | U | U | 0 |
| 148 | SEYCHELLES                      | SC | AFRO      | U | U | S | U | 1 |
| 149 | SIERRA LEONE                    | SL | AFRO      | U | U | U | U | 0 |
| 150 | SINGAPORE                       | SG | WPRO      | U | U | U | U | 0 |
| 151 | SLOVAKIA                        | SK | EURO      | U | U | S | U | 1 |
| 152 | SLOVENIA                        | SI | EURO      | S | U | U | U | 1 |
| 153 | SOLOMON ISLANDS                 | SB | WPRO      | U | S | S | S | 3 |
| 154 | SOMALIA                         | SO | EMRO      | U | U | U | U | 0 |
| 155 | SOUTH AFRICA                    | ZA | AFRO      | U | U | U | U | 0 |
| 156 | SPAIN                           | ES | EURO      | U | U | S | S | 2 |
| 157 | SRI LANKA                       | LK | SEAR<br>O | U | S | S | S | 3 |
| 158 | SUDAN                           | SD | EMRO      | S | S | S | S | 4 |
| 159 | SURINAME                        | SR | AMRO      | U | U | U | U | 0 |
| 160 | SWAZILAND                       | SZ | AFRO      | U | U | U | U | 0 |
| 161 | SWEDEN                          | SE | EURO      | S | S | S | S | 4 |
| 162 | SWITZERLAND                     | CH | EURO      | S | S | S | S | 4 |
| 163 | SYRIAN ARAB<br>REPUBLIC         | SY | EMRO      | U | S | S | U | 2 |
| 164 | TAJIKISTAN                      | TJ | EURO      | U | U | U | U | 0 |
| 165 | TANZANIA, UNITED<br>REPUBLIC OF | TZ | AFRO      | U | U | U | U | 0 |
| 166 | THAILAND                        | TH | SEAR<br>O | S | U | U | S | 2 |
| 167 | TIMOR-LESTE                     | TL | SEAR<br>O | U | U | S | U | 1 |
| 168 | TOGO                            | TG | AFRO      | S | S | S | S | 4 |
| 169 | TONGA                           | TO | WPRO      | U | S | S | S | 3 |
| 170 | TRINIDAD AND TOBAGO             | TT | AMRO      | S | U | U | U | 1 |
| 171 | TUNISIA                         | TN | EMRO      | U | U | U | S | 1 |
| 172 | TURKEY                          | TR | EURO      | S | U | U | U | 1 |
| 173 | TURKMENISTAN                    | TM | EURO      | S | S | S | U | 3 |
| 174 | UGANDA                          | UG | AFRO      | U | U | U | U | 0 |
| 175 | UKRAINE                         | UA | EURO      | U | U | U | U | 0 |
| 176 | UNITED ARAB<br>EMIRATES         | AE | EMRO      | U | U | U | U | 0 |
| 177 | UNITED KINGDOM                  | UK | EURO      | U | U | S | S | 2 |
| 178 | UNITED STATES                   | US | AMRO      | U | U | S | U | 1 |
| 179 | URUGUAY                         | UY | AMRO      | S | S | S | U | 3 |
| 180 | UZBEKISTAN                      | UZ | EURO      | U | U | U | S | 1 |
| 181 | VANUATU                         | VU | WPRO      | U | U | U | U | 0 |
| 182 | VENEZUELA                       | VE | AMRO      | S | U | S | U | 2 |
| 183 | VIET NAM                        | VN | WPRO      | U | U | S | S | 2 |

|     |          |    |      |   |   |   |   |   |
|-----|----------|----|------|---|---|---|---|---|
| 184 | YEMEN    | YE | EMRO | U | U | S | U | 1 |
| 185 | ZAMBIA   | ZM | AFRO | S | S | S | S | 4 |
| 186 | ZIMBABWE | ZW | AFRO | S | S | S | S | 4 |
